# Supplementary material for: Knockdown of exosome-mediated lnc-PVT1 alleviates lipopolysaccharide-induced osteoarthritis progression by mediating the HMGB1/TLR4/NF-κB pathway via miR-93-5p
Source: PubMed Central journal article supplement — Mol Med Rep. 2020 Oct 14;22(6):5313–25. doi: 10.3892/mmr.2020.11594 (PMC7646997; doi:10.3892/mmr.2020.11594), 2020-10-14

Figure S1. Influence of PVT1 silencing on the level of PVT1 of exosome-induced C28/I2 cells. (A) The expression of PVT1 in C28/I2 cells after PBS or exosome treatment was detected by RT-qPCR. (B) The expression of PVT1 in exosome-induced C28/I2 cells transfected with si-NC or si-PVT1 was analyzed with RT-qPCR. \* $P < 0.05$ . PVT1, plasmacytoma variant translocation 1; RT-qPCR, reverse transcription-quantitative PCR; si, short interfering RNA; NC, negative control.

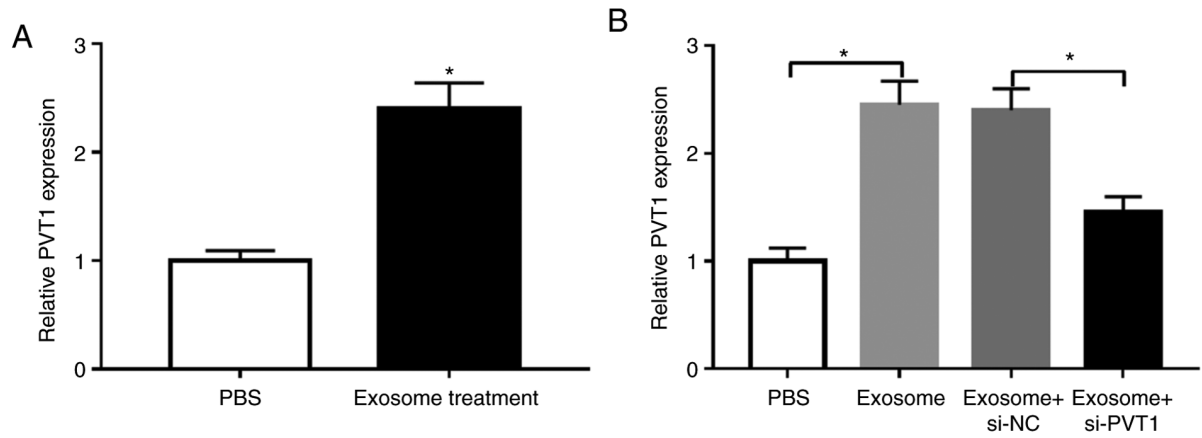

Supplement: Supplementary_Data.pdf [file Supplementary_Data.pdf]
